# Supplementary material for: Should I Stay or Should I Go? Associations between Occupational Factors, Signs of Exhaustion, and the Intention to Change Workplace among Swedish Principals
Source: MDPI journal article supplement (doi:10.3390/ijerph18105376), 2021-05-18
Supplement: s1 [file s1]

**Supplementary Table S2.** Changes of reported exposures (2018 *vs.* 2019) in group 7 (Leave/ Change/ Stay) and group 8 (Leave/ Change/ Leave) (Figure 1); comparison of exposures between group 7 and group 8 (2018 and 2019). Results in bold face are statistically significant.

|                                     |                                            | Group 7 (Leave/ Change/ Stay)<br>N=21 |           |                                                  | Group 8 (Leave/ Change/ Leave)<br>N=19 |           |                                                  | Difference between<br>Group 7 and Group 8<br>p-value <sup>A</sup> |      |
|-------------------------------------|--------------------------------------------|---------------------------------------|-----------|--------------------------------------------------|----------------------------------------|-----------|--------------------------------------------------|-------------------------------------------------------------------|------|
|                                     |                                            | 2018                                  | 2019      | 2018 <i>vs.</i><br>2019;<br>p-value <sup>B</sup> | 2018                                   | 2019      | 2018 <i>vs.</i><br>2019;<br>p-value <sup>B</sup> | 2018                                                              | 2019 |
| Independent factors                 | Categories/Scale                           |                                       |           |                                                  |                                        |           |                                                  |                                                                   |      |
| Gender; N (%)                       | <i>Female</i>                              | 15 (71)                               |           |                                                  | 10 (53)                                |           |                                                  | 0.33                                                              |      |
|                                     | <i>Male</i>                                | 6 (29)                                |           |                                                  | 9 (47)                                 |           |                                                  |                                                                   |      |
| Age (2018); mean (SD)               | <i>years</i>                               | 47 (5)                                |           |                                                  | 47 (7)                                 |           |                                                  | 0.54                                                              |      |
| School owner; N (%)                 | <i>Municipality</i>                        | 18 (86)                               | 21 (100)  | 0.25                                             | 18 (95)                                | 16 (84)   | 0.50                                             | 0.61                                                              | 0.10 |
|                                     | <i>Other organisation</i>                  | 3 (14)                                | 0         |                                                  | 1 (5)                                  | 3 (16)    |                                                  |                                                                   |      |
| Job title; N (%)                    | <i>Principle</i>                           | 16 (76)                               | 17 (81)   | 1.0                                              | 13 (68)                                | 12 (63)   | 1.0                                              | 0.73                                                              | 0.70 |
|                                     | <i>Assistant principle</i>                 | 5 (24)                                | 4 (19)    |                                                  | 6 (32)                                 | 5 (26)    |                                                  |                                                                   |      |
|                                     | <i>Other title<sup>C</sup></i>             | -                                     | 0         |                                                  | -                                      | 2 (11)    |                                                  |                                                                   |      |
| Number of co-workers; mean (SD)     |                                            | 30 (11)                               | 32 (13)   | 0.49                                             | 34 (15)                                | 29 (11)   | 0.54                                             | 0.50                                                              | 0.56 |
| Staff access/availability; N (%)    | <i>Full staff</i>                          | 13 (62)                               | 15 (71)   | 0.73                                             | 7 (37)                                 | 11 (58)   | 0.22                                             | 0.20                                                              | 0.51 |
|                                     | <i>Very or somewhat understaffed</i>       | 8 (38)                                | 6 (29)    |                                                  | 12 (63)                                | 8 (42)    |                                                  |                                                                   |      |
| Number of students; mean (SD)       |                                            | 218 (88)                              | 266 (171) | 0.73                                             | 252 (106)                              | 253 (150) | 0.86                                             | 0.25                                                              | 0.89 |
| Overtime; N (%)                     | <i>Once a week or less often</i>           | 4 (19)                                | 3 (14)    | 0.66                                             | 2 (11)                                 | 2 (11)    | 0.32                                             | 0.66                                                              | 1.00 |
|                                     | <i>Every day or a few days/week</i>        | 17 (81)                               | 18 (86)   |                                                  | 17 (89)                                | 15 (79)   |                                                  |                                                                   |      |
|                                     | <i>No agreed working hours<sup>D</sup></i> | 0                                     | 0         |                                                  | 0                                      | 2 (11)    |                                                  |                                                                   |      |
| Physical working environment; N (%) | <i>Adequate, good or very good</i>         | 21 (100)                              | 17 (81)   | 0.12                                             | 8 (42)                                 | 13 (68)   | 0.23                                             | <0.001                                                            | 0.47 |
|                                     | <i>Poor or very poor</i>                   | 0                                     | 4 (19)    |                                                  | 11 (58)                                | 6 (32)    |                                                  |                                                                   |      |

|                                                                         |                   |           |           |             |           |           |             |              |             |
|-------------------------------------------------------------------------|-------------------|-----------|-----------|-------------|-----------|-----------|-------------|--------------|-------------|
| <b>Demanding organisational and social work environment; mean (SD)</b>  |                   |           |           |             |           |           |             |              |             |
| <i>Resource deficits</i>                                                | Score 1-5         | 3.5 (0.8) | 3.5 (1.2) | 0.67        | 3.8 (0.8) | 3.3 (1.1) | <b>0.04</b> | 0.22         | 0.44        |
| <i>Organisational Control</i>                                           | Score 1-5         | 2.5 (1.0) | 2.7 (1.0) | 0.32        | 3.1 (0.8) | 2.9 (0.8) | 0.39        | <b>0.04</b>  | 0.50        |
| <i>Role conflicts</i>                                                   | Score 1-5         | 3.7 (1.0) | 3.6 (0.8) | 0.65        | 4.3 (0.6) | 3.8 (0.8) | <b>0.02</b> | 0.05         | 0.49        |
| <i>Role demands</i>                                                     | Score 1-5         | 3.0 (0.9) | 2.8 (0.7) | 0.21        | 3.4 (0.6) | 3.2 (0.6) | 0.16        | 0.26         | 0.08        |
| <i>Group dynamics</i>                                                   | Score 1-5         | 2.2 (0.8) | 2.3 (0.7) | 0.61        | 2.9 (0.9) | 2.6 (0.5) | 0.21        | <b>0.02</b>  | 0.07        |
| <i>Buffer-function</i>                                                  | Score 1-5         | 2.8 (0.7) | 2.6 (0.8) | 0.48        | 3.6 (0.8) | 3.5 (0.9) | 0.24        | <b>0.001</b> | <b>0.01</b> |
| <i>Co-workers</i>                                                       | Score 1-5         | 2.7 (0.6) | 2.9 (0.6) | 0.11        | 3.2 (0.9) | 3.3 (0.6) | 0.75        | <b>0.05</b>  | 0.08        |
| <i>Container-function</i>                                               | Score 1-5         | 3.1 (0.8) | 3.2 (0.8) | 0.71        | 3.9 (0.6) | 3.7 (0.8) | 0.28        | <b>0.003</b> | 0.09        |
| <b>Supportive organisational and social work environment; mean (SD)</b> |                   |           |           |             |           |           |             |              |             |
| <i>Supportive management</i>                                            | Score 1-5         | 2.9 (1.0) | 3.3 (1.0) | 0.07        | 2.7 (0.9) | 2.7 (1.1) | 0.87        | 0.67         | 0.06        |
| <i>Cooperating with co-workers</i>                                      | Score 1-5         | 4.5 (0.5) | 4.2 (0.6) | 0.10        | 4.1 (0.5) | 4.0 (0.7) | 0.57        | <b>0.01</b>  | 0.38        |
| <i>Supportive colleagues</i>                                            | Score 1-5         | 3.7 (1.0) | 3.7 (0.9) | 0.79        | 2.9 (1.4) | 3.5 (1.0) | <b>0.04</b> | 0.05         | 0.50        |
| <i>Supportive private life</i>                                          | Score 1-5         | 3.7 (0.9) | 4.2 (0.8) | <b>0.01</b> | 3.5 (1.4) | 3.8 (1.2) | 0.12        | 0.92         | 0.35        |
| <i>Supportive organisational structures</i>                             | Score 1-5         | 3.3 (0.9) | 3.5 (1.0) | 0.20        | 3.3 (0.7) | 2.9 (1.0) | <b>0.04</b> | 0.69         | 0.09        |
| <b>Stressful external expectations; mean (SD)</b>                       |                   |           |           |             |           |           |             |              |             |
| <i>The National Agency of Education</i>                                 | Score 1-7         | 3.0 (1.9) | 3.4 (1.7) | 0.41        | 4.0 (1.6) | 3.4 (1.9) | 0.21        | 0.12         | 0.89        |
| <i>The Swedish school-inspectorate</i>                                  | Score 1-7         | 4.3 (2.1) | 5.2 (1.6) | 0.07        | 4.6 (1.7) | 4.5 (2.0) | 0.64        | 0.73         | 0.27        |
| <i>School owner</i>                                                     | Score 1-7         | 3.8 (1.8) | 3.8 (1.4) | 0.93        | 4.7 (1.6) | 4.7 (1.6) | 0.97        | 0.17         | <b>0.03</b> |
| <i>Super Intendent</i>                                                  | Score 1-7         | 3.0 (1.6) | 3.4 (1.6) | 0.29        | 4.1 (1.6) | 3.9 (1.9) | 0.70        | <b>0.04</b>  | 0.32        |
| <i>Immediate supervisor</i>                                             | Score 1-7         | 3.1 (1.5) | 3.0 (1.4) | 0.81        | 3.9 (1.5) | 4.3 (1.6) | 0.34        | 0.14         | <b>0.01</b> |
| <i>Co-workers</i>                                                       | Score 1-7         | 3.9 (1.5) | 4.1 (1.2) | 0.56        | 4.9 (1.5) | 4.0 (1.8) | 0.08        | 0.05         | 0.94        |
| <i>Parents</i>                                                          | Score 1-7         | 4.7 (1.8) | 4.6 (1.4) | 0.67        | 5.0 (1.7) | 4.7 (1.8) | 0.50        | 0.71         | 0.57        |
| <i>Students</i>                                                         | Score 1-7         | 2.8 (1.7) | 2.8 (1.6) | 0.89        | 3.5 (1.8) | 2.6 (1.4) | <b>0.02</b> | 0.23         | 0.67        |
| <b>Karolinska Exhaustion Disorder Scale (KEDS)</b>                      |                   |           |           |             |           |           |             |              |             |
| Mean score (SD)                                                         | Score 0-54        | 14 (8.5)  | 13 (9)    | 0.94        | 17 (7)    | 17 (10)   | 0.69        | 0.08         | 0.39        |
| Possible exhaustion disorder; N (%)                                     | Score ≥ 19 points | 6 (29)    | 3 (14)    | 0.25        | 9 (47)    | 9 (47)    | 1.0         | 0.33         | <b>0.04</b> |

<sup>A</sup> The Mann Whitney U-test was used for continuous variables and Fisher's exact test was used for dichotomous variables.

<sup>B</sup> The Wilcoxon Signed Rank Test was used for continuous variables and McNemar's test for dichotomous variables.

<sup>c</sup>Two individuals with “other title” in 2019 were excluded from the statistical analysis.

<sup>d</sup>Participants with “No agreed working hours” were excluded from the statistical analysis.
