# Supplementary material for: Should I Stay or Should I Go? Associations between Occupational Factors, Signs of Exhaustion, and the Intention to Change Workplace among Swedish Principals
Source: MDPI journal article supplement (doi:10.3390/ijerph18105376), 2021-05-18
Supplement: s1 [file s1]

**Supplementary Table S1.** Description of the scales in the 32-item Gothenburg Manager Stress Inventory (GMSI)-Mini<sup>a</sup>.

| <b>Demanding factors</b>             | <b>Description</b>                                                                                                                                                                                                                                                                                       | <b>Number of items</b> |
|--------------------------------------|----------------------------------------------------------------------------------------------------------------------------------------------------------------------------------------------------------------------------------------------------------------------------------------------------------|------------------------|
| Resource deficits                    | Insufficient possibilities of affecting the allocation of resources to the organisation; lacking resources due to decisions by superiors, politicians, or governmental authorities; not enough resources to cope with peak loads.                                                                        | 3                      |
| Organisational control               | Severe difficulties in implementing the decisions from superior levels in the organisation; difficulties following how decisions are made in the organisation.                                                                                                                                           | 2                      |
| Role conflicts                       | Conflicts between administrative work, organisational development and co-workers; not enough time for organisational development; difficulties in finding the time to discuss daily activities with colleagues                                                                                           | 3                      |
| Role demands                         | Demanding responsibilities for (a) performance and quality; (b) personnel; (c) the work environment; and (d) organisational development.                                                                                                                                                                 | 4                      |
| Group dynamics                       | Problems with feelings of safety and mutual trust within the co-worker group; feelings of not knowing what is going on in your co-worker group; Co-workers having trouble accepting the mutual work goals.                                                                                               | 3                      |
| Buffer-function                      | Demands of being a buffer between co-workers and higher levels in the organisation; demands of having to explain "bad/negative" decisions that have been made by superiors; superiors expecting you to be understanding and committed to accepting decisions that are bad for you and your organisation. | 3                      |
| Co-workers                           | Demands on helping co-workers organise and structure their work; that co-workers have insufficient structure in their work.                                                                                                                                                                              | 2                      |
| Container-function                   | Demands of dealing with co-workers' frustrations that work is psychologically challenging; that burdened co-workers burden you with their problems.                                                                                                                                                      | 2                      |
| <b>Supportive factors</b>            |                                                                                                                                                                                                                                                                                                          |                        |
| Supportive management                | Trusting that superiors, when needed, will help me to solve work environment problems for my co-workers; experiencing that superiors express a genuine interest for what I do and the problems I have as a leader.                                                                                       | 2                      |
| Cooperating co-workers               | Feeling that co-workers want to take responsibility for their work; feeling that co-workers have valuable knowledge that makes my work easier.                                                                                                                                                           | 2                      |
| Supportive manager colleagues        | When needed, I have access to proper support from my fellow school leader colleagues; I have true possibilities to reflect and discuss organisational issues with my fellow school leader colleagues.                                                                                                    | 2                      |
| Supportive private life              | My leisure time interests facilitate relaxation from work and associated problems; my leisure time really provides me with opportunities to rest and relax from work.                                                                                                                                    | 2                      |
| Supportive organisational structures | My authority in my work is clear and defined; my area of responsibility and tasks as a leader are clear and defined.                                                                                                                                                                                     | 2                      |

<sup>a</sup>This information has previously been presented in Persson et al [15].
